# Supplementary material for: Organic reactivity of alcohols in superheated aqueous salt solutions: an overview
Source: Royal Society of Chemistry journal article supplement (doi:10.1039/c2nj21038j), 2012-01-01
Supplement: c2nj21038j.pdf [file c2nj21038j.pdf]

# Supplementary material for “Organic reactivity of alcohols in superheated aqueous salt solutions: An overview”

By Sabine Avola,<sup>a</sup> Frédéric Goettmann,<sup>b</sup> Markus Antonietti\*<sup>c</sup> and Werner Kunz\*<sup>a</sup>

**Table S1.** Overview of reactions of different alcohols at 200°C in 1M NaCl solution, compared to pure HTW.

| Alcohol                       | Structure of the substrate <sup>[a]</sup>                                                         | Main product <sup>[a]</sup>                                                                        | Side product(s) <sup>[a]</sup>                                                                       |                                                                                                     |
|-------------------------------|---------------------------------------------------------------------------------------------------|----------------------------------------------------------------------------------------------------|------------------------------------------------------------------------------------------------------|-----------------------------------------------------------------------------------------------------|
| 1-Phenylpropanol              |  1 %<br>(2 %)    |  92 %<br>(92 %)   |  7 %<br>(6 %)     |                                                                                                     |
| 1-Heptanol                    |  99 %<br>(99 %)  |  1 %<br>(1 %)     |  0 %<br>(0 %)      |                                                                                                     |
| 1-Methylcyclohexanol          |  3 %<br>(4 %)    |  80 %<br>(58 %)   |  1 %<br>(1 %)     |                                                                                                     |
| exo-Norborneol                |  85 %<br>(88 %)  |  1 %<br>(0 %)     |  1 %<br>(0 %)     |                                                                                                     |
| 1,2,3,4-Tetrahydro-1-naphthol |  0 %<br>(1 %)    |  72 %<br>(95 %)   |  2 %<br>(0 %)     |                                                                                                     |
| 1-Phenyl-1,2-ethanediol       |  5 %<br>(0 %)    |  65 %<br>(84 %)   |  9 %<br>(16 %)    |                                                                                                     |
| Pinacol                       |  2 %<br>(1 %)  |  32 %<br>(33 %) |  27 %<br>(9 %)  |                                                                                                     |
| meso-Hydrobenzoin             |  0 %<br>(0 %)  |  96 %<br>(83 %) |  4 %<br>(17 %)  |                                                                                                     |
| α-Terpineol                   |  1 %<br>(3 %)  |  31 %<br>(29 %) |  23 %<br>(24 %) |  17 %<br>(9 %) |
| (-)-Carveol                   |  0 %<br>(0 %)  |  35 %<br>(38 %) |  2 %<br>(2 %)   |                                                                                                     |
| (-)-Isopulegol                |  16 %<br>(3 %) |  17 %<br>(6 %)  |  11 %<br>(1 %)  |  1 %<br>(4 %)  |

<sup>s</sup> [a] The figures next to the molecular formula refer to the relative abundance of the substance in the extract, compared to 5mmol substance of starting material before the reaction. The top figures belong to a reaction in 1 M salt solution, whereas the figures in brackets correspond to a reaction in pure water.

**Table S2.** Impact of increased concentration of 1-phenylpropanol of the outcome of the reaction at 180°C in M NaCl

| 1-Phenyl propanol (mmol) | Conversion (%) | Cis-1-Phenylpropene (%) | Trans-1-Phenylpropene (%) |
|--------------------------|----------------|-------------------------|---------------------------|
| 5                        | 96             | 88                      | 7                         |
| 10                       | 72             | 67                      | 6                         |
| 25                       | 51             | 48                      | 4                         |
